# Supplementary material for: The parathyroid hormone regulates skin tumour susceptibility in mice
Source: PubMed Central journal article supplement (PMC5593851; doi:10.1038/s41598-017-11561-x), 2017-09-11
Supplement: 41598_2017_11561_MOESM1_ESM.pdf [file 41598_2017_11561_MOESM1_ESM.pdf]

## Supplementary information

The parathyroid hormone regulates skin tumour susceptibility in mice

Kazuhiro Okumura<sup>1</sup>, Megumi Saito<sup>1</sup>, Yasuhiro Yoshizawa<sup>1</sup>, Haruka Munakata<sup>1</sup>, Eriko Isogai<sup>1</sup>, Ikuo Miura<sup>2</sup>, Shigeharu Wakana<sup>2</sup>, Midori Yamaguchi<sup>3</sup>, Hiroshi Shitara<sup>3</sup>, Choji Taya<sup>3</sup>, Andrew C. Karaplis<sup>4</sup>, Ryo Kominami<sup>5</sup>, Yuichi Wakabayashi<sup>1</sup>

<sup>1</sup>Department of Carcinogenesis Research, Division of Experimental Animal Research, Chiba Cancer Center Research Institute, 666-2 Nitonacho Chuouku, Chiba 260-8717 Japan.

<sup>2</sup>Technology and Development Team for Mouse Phenotype Analysis: Japan Mouse Clinic, Riken Bioresource Center, 3-1-1 Koyadai, Tsukuba, Ibaraki 305-0074, Japan.

<sup>3</sup>Laboratory for Transgenic Technology, Tokyo Metropolitan Institute of Medical Science, 1-6, Kamikitazawa 2-chome, Setagaya-ku, Tokyo, 156-8506, Japan.

<sup>4</sup>McGill University and Jewish General Hospital, 3755 Côte-Ste-Catherine Road, E-104 Montreal, Quebec H3T 1E2, Canada.

<sup>5</sup>Department of Molecular Physiology, Niigata University School of Medicine, Asahimachi 1-757, Niigata 951-8510, Japan.

\* Corresponding author

E-mail: [yuichi\\_wakabayashi@chiba-cc.jp](mailto:yuichi_wakabayashi@chiba-cc.jp)

**a**

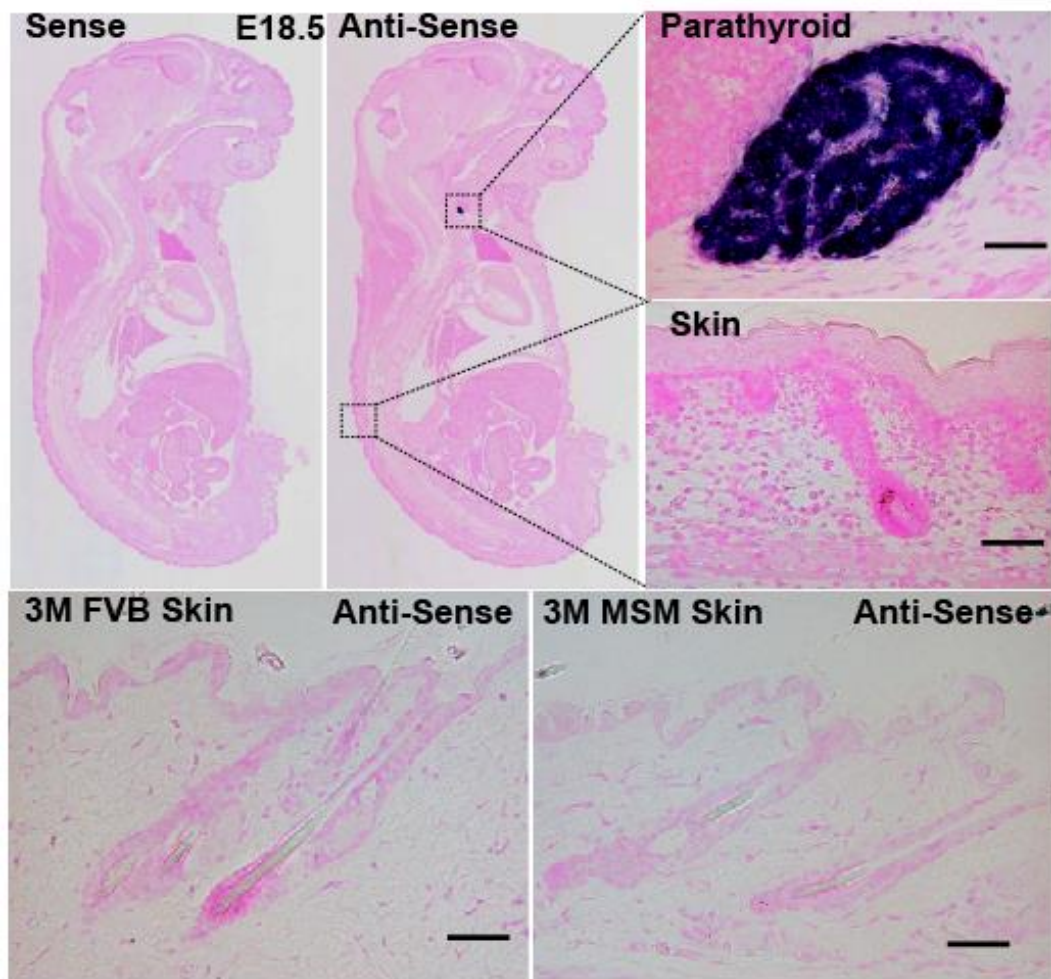

**b**

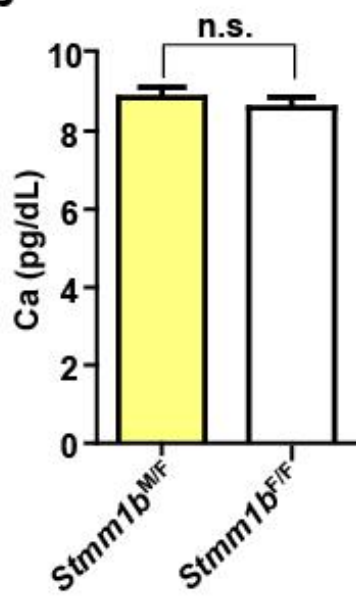

**c**

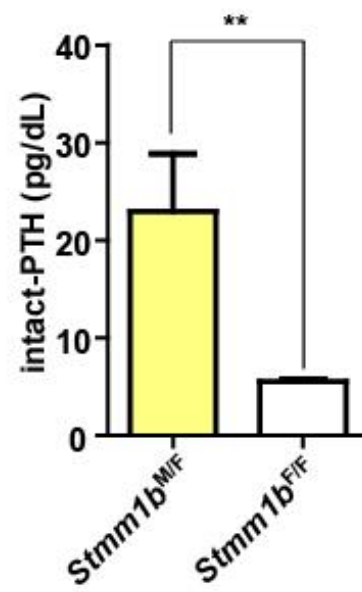

**Supplementary Figure S1. *Pth* mRNA localization and *Stmm1b* sub-congenic line shows increase in iPTH in sera. a)** Upper panels show *Pth* mRNA expression pattern in E18.5 C57B6/J mice by *in situ* hybridization. Bottom panels indicate *Pth* is not expressed in the dorsal back skins of 3-month-old FVB and MSM mice. Scale bars, 50  $\mu$ m. **b)** The means of serum calcium concentrations in *Stmm1b*<sup>F/F</sup> and *Stmm1b*<sup>M/F</sup> by o-Cresolphthalein-complexone (oCPC method) (n=4 each; female, 3 M). n.s., no significant differences. **c)** The means of serum intact-PTH concentration in *Stmm1b*<sup>F/F</sup> and *Stmm1b*<sup>M/F</sup>, respectively (n=4 each; female, 3 M) by mouse intact-PTH ELISA. The *P*-value was calculated by *t*-test (\*\**P* < 0.01). Asterisks indicate significant difference. **b), c)** Error bars are standard deviation (SD). Scale bars, 50  $\mu$ m.

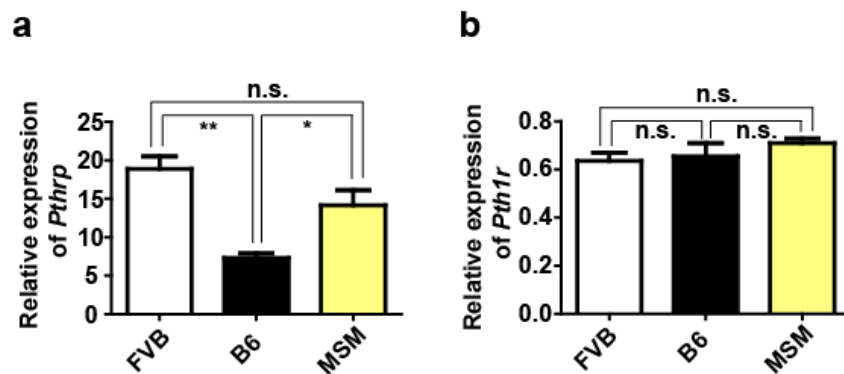

**Supplementary Figure S2. The comparison of *Pthrp* and *Pth/Pthrp* receptor mRNA levels among FVB, B6 and MSM strains. a)** Comparison of *Pthrp* mRNA in the dorsal back skins among 3-month-old FVB, B6 and MSM mice by qRT-PCR. **b)** Comparison of *Pth1r* mRNA in the dorsal back skins among 3-month-old FVB, B6 and MSM mice by qRT-PCR. The *Pthrp* and *Pth1r* transcript levels are shown relative to the transcript levels of *ActB*. Error bars are the standard deviations (S.D.). The *P*-value was calculated by *t*-test (\**P* < 0.05, \*\**P* < 0.01). Asterisks indicate significant differences. n.s., no significant differences.

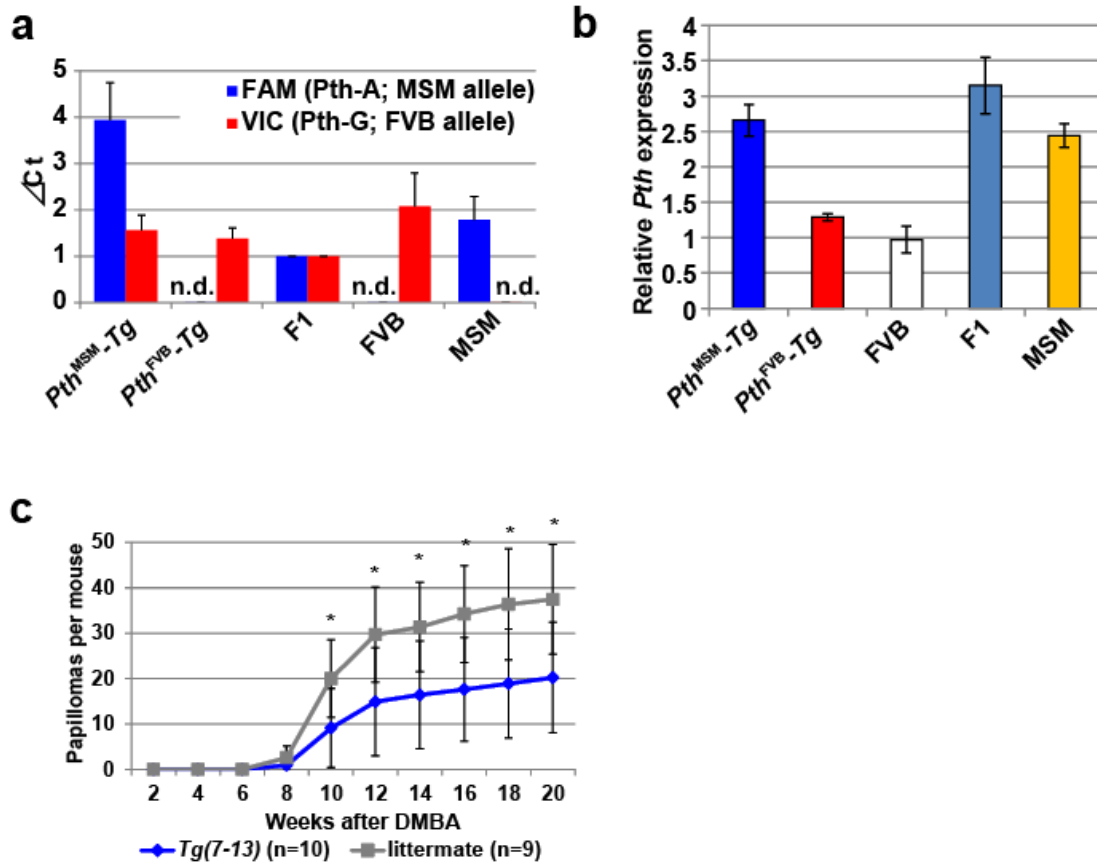

**Supplementary Figure S3. The copy number analysis of the *Pth* allele in BAC-transgenic mice and another *Tg* line reveals resistance to skin carcinogenesis. a)** Allelic discrimination analysis by TaqMan specific PCR to detect  $Pth^{FVB}$  and  $Pth^{MSM}$  alleles. VIC (*Pth*-G) and FAM (*Pth*-A) fluorescence are shown for each probe. F1 hybrid (FVB×MSM) is a control as one copy for each allele. n.d., not detected. **b)** Comparison of *Pth* mRNA expression levels among  $Pth^{MSM-Tg}$  mice, littermates, FVB/N, F1 hybrid (FVB×MSM) and MSM/Ms by qPCR. mRNAs were isolated from whole body new born pups (postnatal day 0). **c)** Comparison of the average papilloma number per mouse between *Tg(7-13)* (another line of  $Pth^{MSM-Tg}$ ) and littermate mice. The *P*-value was calculated for papilloma number at 10-20 weeks by *t*-test (\**P* < 0.01). Asterisks indicate significant differences. **a), b), c)** Error bars are standard deviation (SD).

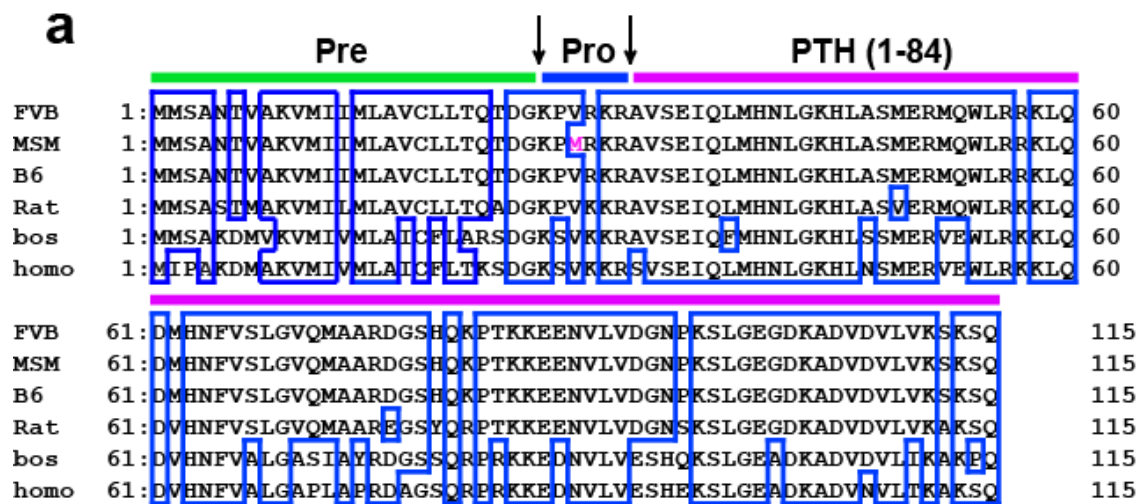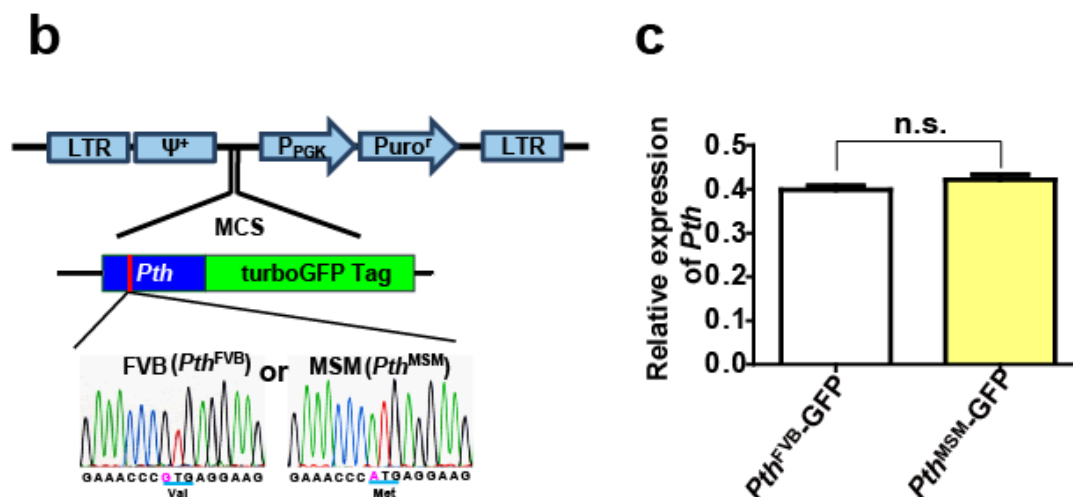

**Supplementary Figure S4. Alignment of PTH amino acids of several mammals and a schematic drawing of  $Pth^{FVB}$  and  $Pth^{Met}$  constructs. a)** Alignment of Pre-Pro-PTH of three mouse strains, rat, cow and human. Green lines indicate the signal peptide sequence region (Pre). A horizontal bold blue line indicates the Pro region. Pink lines indicate the biological active sequence (PTH1-84). Inside the blue lines indicates conserved amino acid sequences. **b)** A schematic drawing of  $Pth$ -turboGFP Tag constructs for each allele. **c)** qRT-PCR analysis verifying the equivalent transcript levels of  $Pth$  in  $Pth^{Val}$  ( $Pth^{FVB}$  allele)- and  $Pth^{Met}$  ( $Pth^{MSM}$  allele)-transfected NIH-3T3 cells. The  $P$ -value was calculated by  $t$ -test. n.s., no significant differences. Error bars are standard deviation (SD).

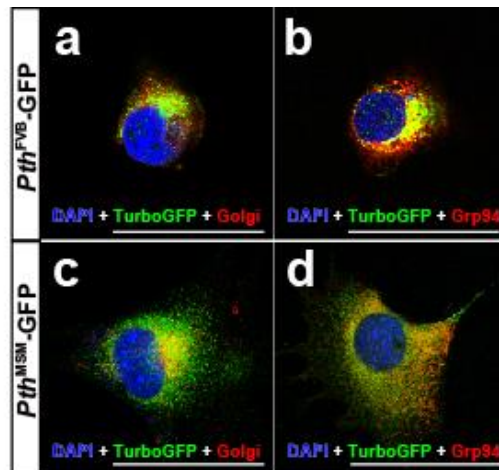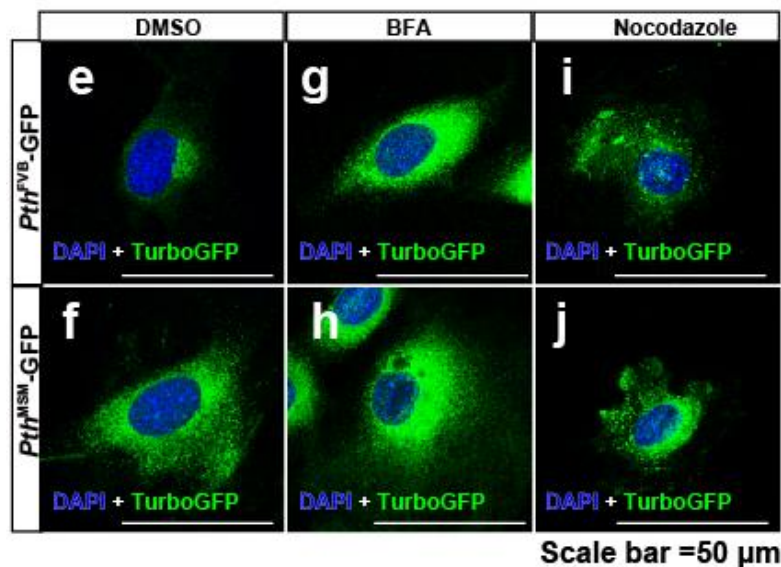

**Supplementary Figure S5. Immunofluorescence staining of PTH-GFP in *Pth*<sup>FVB</sup>- and *Pth*<sup>MSM</sup>-transfected NIH-3T3 cells and treatment with protein transport inhibitors.**

**a)-d)** Immunofluorescence staining of PTH-GFP in *Pth*<sup>FVB</sup>- and *Pth*<sup>MSM</sup>-transfected NIH-3T3 cells. Transfected cells were stained with anti-turboGFP antibody (green), in combination with TR Ceramide as a Golgi marker (**a, c**) or Grp94 as an ER marker (**b, d**) (red). Cells were counterstained with DAPI (blue). **e)-l)** Immunofluorescence staining of PTH-GFP in DMSO (control), BFA (10 mM) and Nocodazole (10 mM) treated *Pth*<sup>FVB</sup>- and *Pth*<sup>MSM</sup>-transfected NIH-3T3 cells. Transfected cells were stained with anti-turboGFP antibody (green), and cells were counterstained with DAPI (blue). Scale bars, 50 μm.

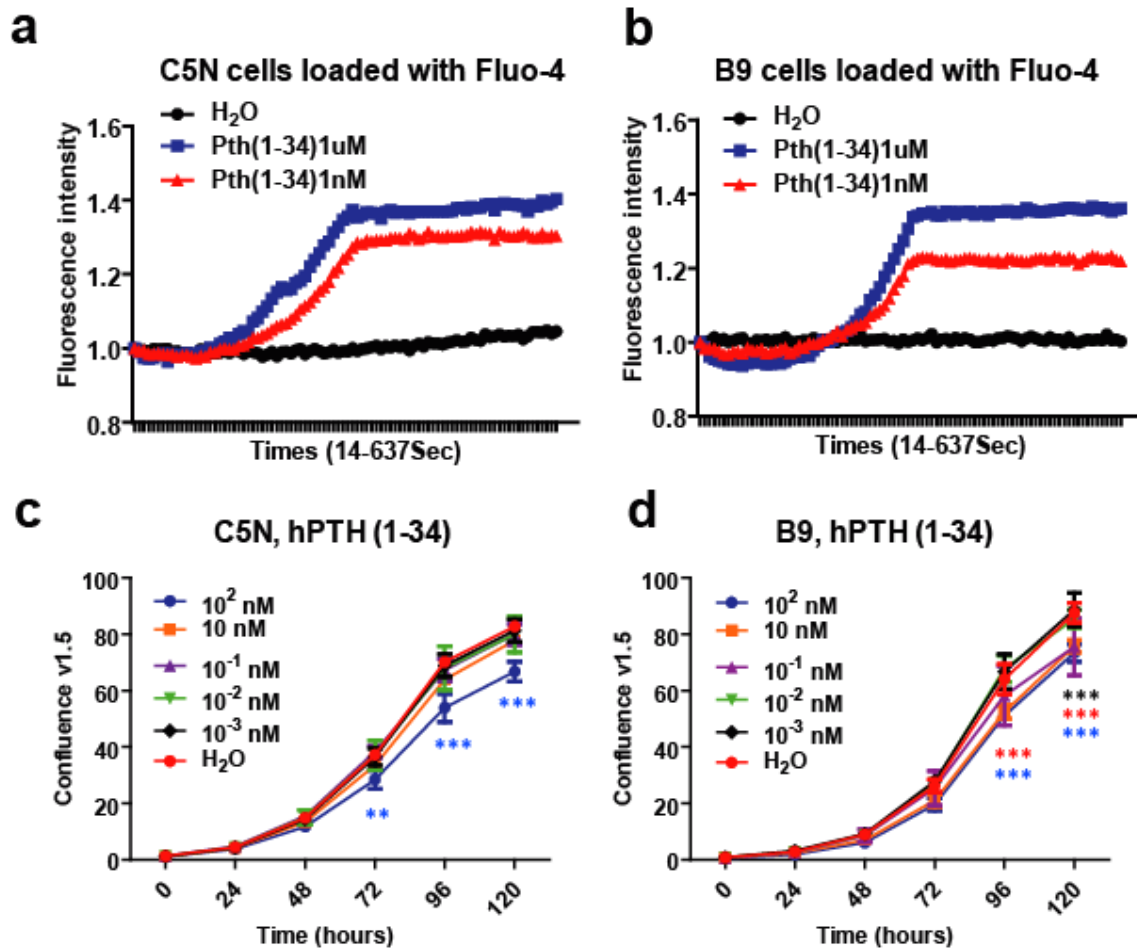

**Supplementary Figure S6. A PTH agonist (hPTH(1-34)) increases intracellular calcium and suppresses cell proliferation in C5N and B9 cells. a), b)** Intracellular calcium was monitored for 637 seconds after adding 1 nM and 1  $\mu$ M of hPTH(1-34) to C5N (**a**) and B9 (**b**) cells. **c), d)** Cell proliferation assay after adding an agonist, hPTH(1-34). This agonist was added to  $1 \times 10^3$  cells of C5N (**a, c**) or B9 (**b, d**) seeded on 96 well plates. **c), d)** Proliferation curves represent means of confluence values  $\pm$  SEM of triplicates. The *P*-values were calculated by two-way ANOVA. Black asterisks indicate H<sub>2</sub>O vs  $10^{-1}$  nM. Red asterisks indicate H<sub>2</sub>O vs 10 nM. Blue asterisks indicate H<sub>2</sub>O vs  $10^2$  nM ( $***P < 0.001$ ,  $**P < 0.01$ ,  $*P < 0.05$ ). Asterisks indicate significant differences. Error bars are standard deviation (SD).

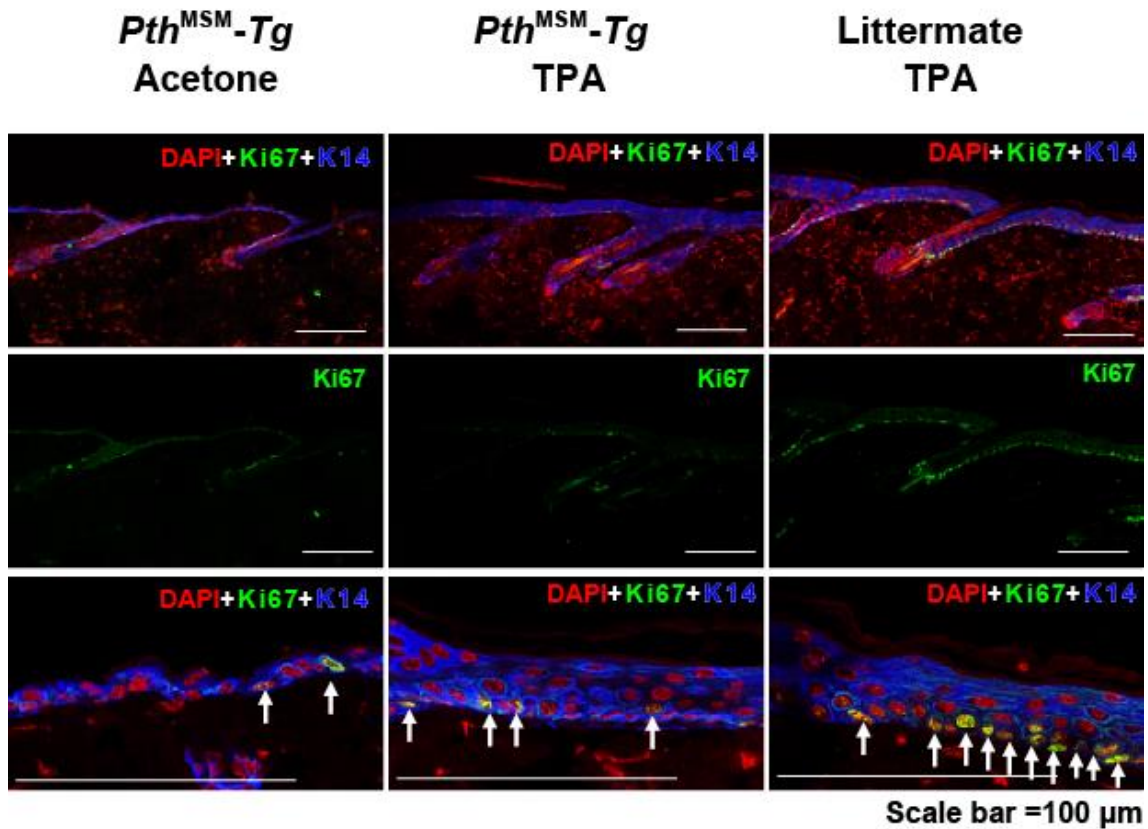

**Supplementary Figure S7. PTH inhibits TPA-induced hyper-proliferation in the epidermis.** *Pth*<sup>MSM</sup>-Tg and their littermates were treated once with TPA (10 μg per mouse in 200 μl of acetone), and skin was collected 48 hours later. Acetone treated *Pth*<sup>MSM</sup>-Tg mice were used as controls. Immunofluorescence staining of proliferative cells in the epidermis was by Anti-Ki-67 antibody (green) in combination with anti-K14 antibody (blue). Cell nuclei were counterstained with DAPI (red). White arrows indicate Ki-67-positive cells. Scale bars, 100 μm.



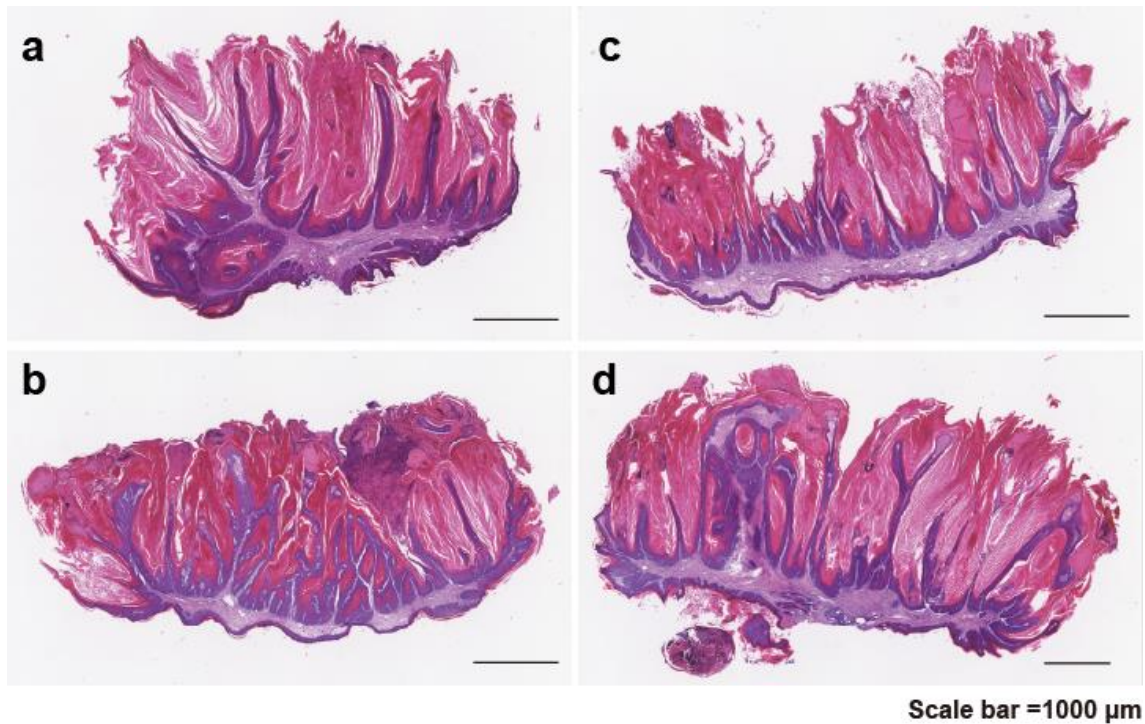

**Supplementary Figure S8. Histological analysis of chemically induced papillomas from *Pth*<sup>MSM-Tg</sup> and *Stmm1b* sub-congenic mice.** **a)** HE staining of a papilloma from a *Pth*<sup>MSM-Tg</sup> mouse in 20 weeks after DMBA treatment. **b)** HE staining of a papilloma from a wild type littermate of *Pth*<sup>MSM-Tg</sup> mice in 20 weeks after DMBA treatment. **c)** HE staining of a papilloma from a *Stmm1b*<sup>MSM/FVB</sup> in 20 weeks after DMBA treatment. **d)** HE staining of a papilloma from a *Stmm1b*<sup>FVB/FVB</sup> mouse in 20 weeks after DMBA treatment. Scale bars, 1,000 μm.

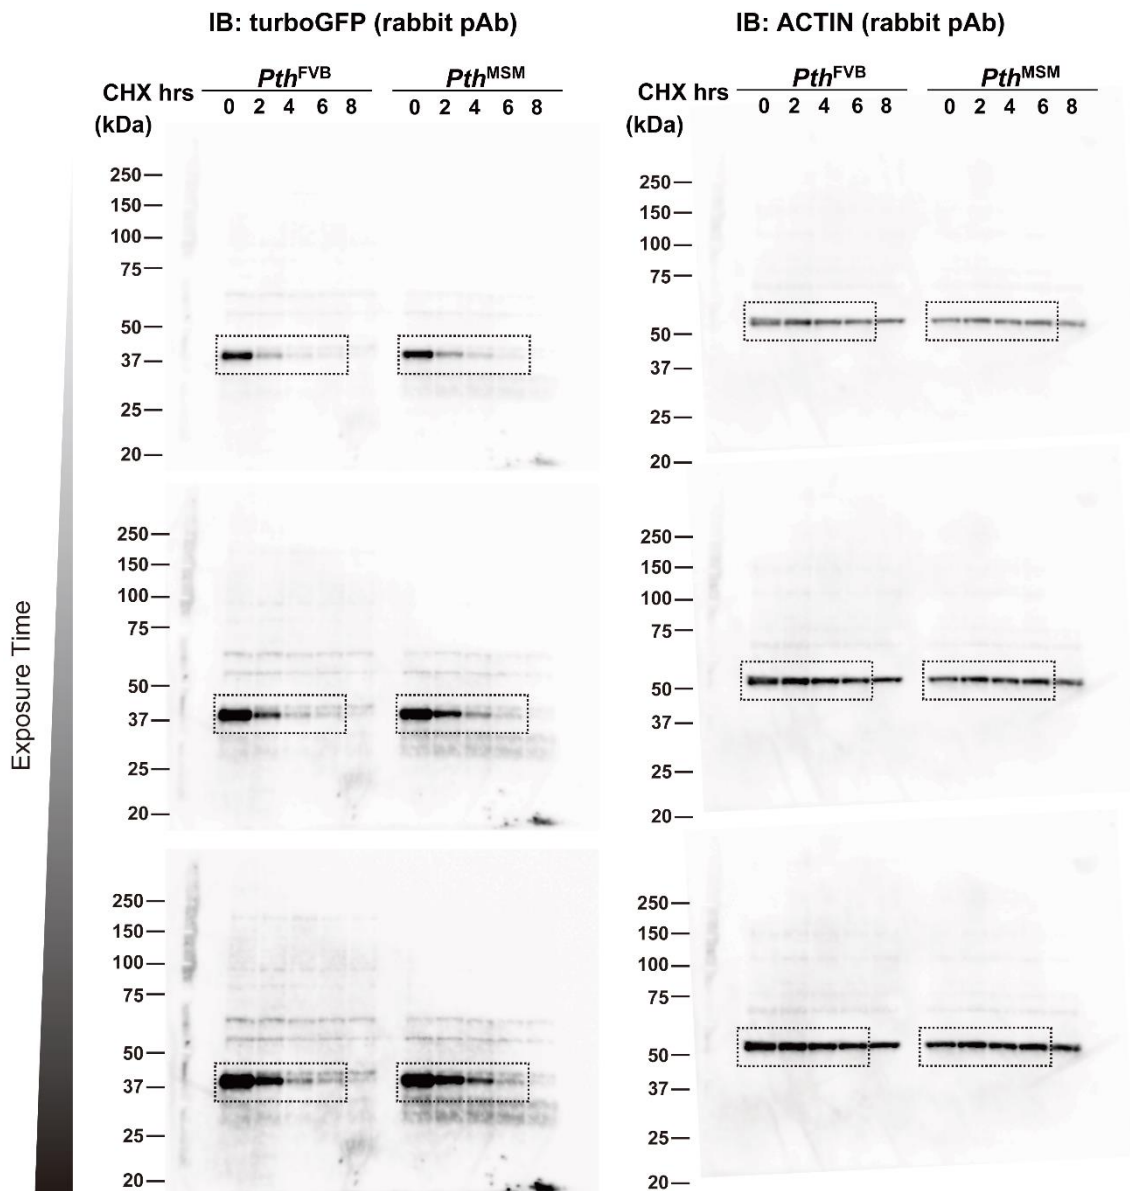

**Supplementary Figure S9. The full-length blots for Figure 4g.** Dashed line boxes indicate the cropped images used in Fig. 4g. The images with three different exposure times are shown for turbo GFP and ACTIN, respectively.

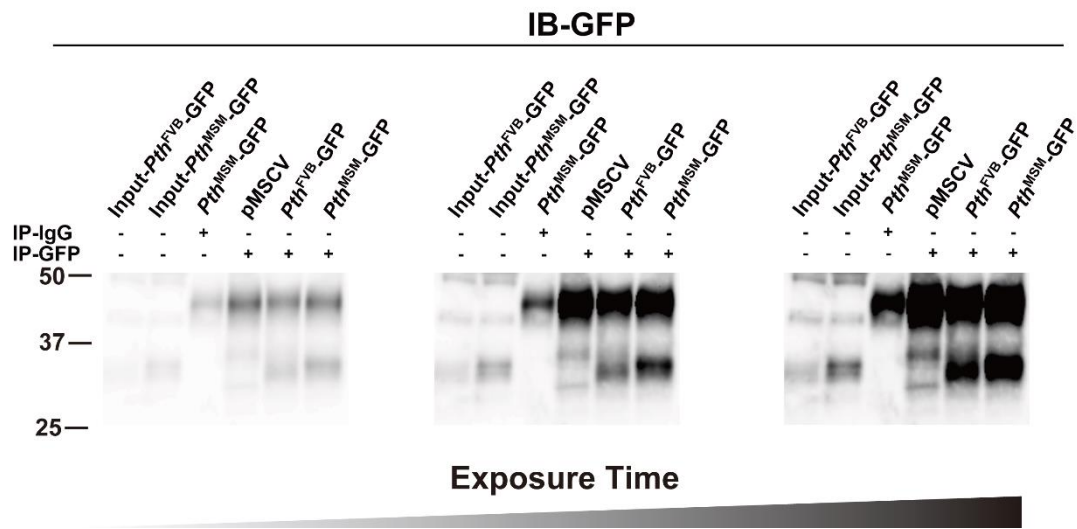

**Supplementary Figure S10.** The image used in Fig. 4i. The images with different exposure times are shown.

| Table S1. Primers used for the genotyping of MSM-BAC clone |             |                           |                            |                                                                         |
|------------------------------------------------------------|-------------|---------------------------|----------------------------|-------------------------------------------------------------------------|
| Gene Symbol                                                | Primer Name | Primer Sequence (5' - 3') | Expected Product Size (bp) | Cycle conditions for PCR                                                |
| <i>Arntl</i>                                               | Arntl-F     | ACCAAGGATCAAGTAGTCCAGTA   | 493                        | 95 °C, 5 min, 1 cycle (94 °C, 30 s; 60 °C, 30 s; 72 °C, 30 s) 40 cycles |
|                                                            | Arntl-R     | ATGGGGGACTTCTTTGTAGTGTA   |                            |                                                                         |
| <i>Btd10</i>                                               | Btd10-F     | CGTCGTAACCTCCTTCTGC       | 583                        |                                                                         |
|                                                            | Btd10-R     | ACCACCTCTTGACGTTCCACC     |                            |                                                                         |
| <i>Pth</i>                                                 | Pth-F3      | GCAAACACCGTGGCTAAAGT      | 249                        |                                                                         |
|                                                            | Pth-R1      | CTCCTTCTTGGTGGGCTTCT      |                            |                                                                         |
| 047A16T7(BAC)                                              | 047AT7-F    | CGTATTTGCGTTAAATGAAGGAG   | 490                        |                                                                         |
|                                                            | 047AT7-R    | TCCATCTATGTCTGGGAGAAGAA   |                            |                                                                         |
| 047A16TJ(BAC)                                              | 047ATJ-F    | GAAACCCTGTCTCGAAAACTG     | 526                        |                                                                         |
|                                                            | 047ATJ-R    | TGGACAGATCCCTATACCCACT    |                            |                                                                         |
| 466J23T7(BAC)                                              | 466JT7-F    | GACATGGAAGCTAGAAAAGGACAT  | 176                        |                                                                         |
|                                                            | 466JT7-R    | AAGCAACAATTTAAACCTGGAAG   |                            |                                                                         |
| 466J23TJ(BAC)                                              | 466JTJ-F    | ATGTGCTTCTCTAGTTAGTGACG   | 245                        |                                                                         |
|                                                            | 466JTJ-R    | GGACATCTCTATCCTTTTCTCCA   |                            |                                                                         |
| <i>Arntl*</i>                                              | Arntl-Ms-F  | CAGTACTGGGGTGGGTAGGA      | 228                        |                                                                         |
|                                                            | Arntl-Ms-R  | TGCTTCAGAGACTGCAAGA       |                            |                                                                         |
| <i>Btd10*</i>                                              | Btd10-Ms-F  | GAGGAAAGGCCCTTGGTCTA      | 151                        |                                                                         |
|                                                            | Btd10-Ms-R  | CGGCAGGCAGAAAAGTAAAG      |                            |                                                                         |

\*These are microsatellite markers. *Arntl* primers were designed around the (CA) repeat region in intron 3. The band size was 228 bp (FVB) and approximately 150 bp (MSM). *Btd10* primers were designed for amplification of the (CA) region in intron 8. The band size was 151 bp (FVB) and approximately 140 bp (MSM).

| Table S2. Primers used for real-time PCR analysis |               |                           |                            |                             |
|---------------------------------------------------|---------------|---------------------------|----------------------------|-----------------------------|
| Gene Symbol                                       | Primer Name   | Primer Sequence (5' - 3') | Expected Product Size (bp) | Reference                   |
| <i>Pth</i>                                        | Pth-F4        | CTGCAGTCCAGTTCATCAGC      | 507                        | Liu Z et al., 2010          |
|                                                   | Pth-R4        | AAGCTTGAAAAGGTAGCAGCA     |                            |                             |
| <i>Pthrp</i>                                      | Pthrp-F       | CAGCCGAAATCAGAGCTACC      | 206                        | —                           |
|                                                   | Pthrp-R       | CTCCTGTTCTCTGCGTTTCC      |                            |                             |
| <i>Pthr1r</i>                                     | Pthr1-F       | GGA CT CAG CCT TCCCCTTAG  | 220                        | —                           |
|                                                   | Pthr1-R       | CTTCTGCAACAATGGAGGT       |                            |                             |
| <i>Lor</i>                                        | Lor-F         | CCTGTGGGTTGTGGAAGACC      | 117                        | Geng S et al., 2006         |
|                                                   | Lor-R         | AGAGCCTCCTCCAGATGAGC      |                            |                             |
| <i>Flg</i>                                        | Flg-F         | GTTTCCAAACACATGGATCAAAT   | 247                        | Hansmann B et al., 2012     |
|                                                   | Flg-R         | TTTGAATCTTGTGGTGTCTGTG    |                            |                             |
| <i>Krt10</i>                                      | Krt10-F       | CGTACTGTTTCAGGGTCTGGAG    | 65                         | Omori-Miyake M et al., 2013 |
|                                                   | Krt10-R       | GCTTCCAGCGATTGTTCA        |                            |                             |
| <i>Actb</i>                                       | F2-beta actin | ACCTCATGAAGATCCTGACC      | 195                        | —                           |
|                                                   | R2-beta actin | CGTTGCCAATAGTGATGACC      |                            |                             |
